# Supplementary material for: Synthesis, crystal chemistry, and optical properties of two methylammonium silver halides: CH3NH3AgBr2 and CH3NH3Ag2I3
Source: Royal Society of Chemistry journal article supplement (doi:10.1039/d1tc01737c), 2021-01-01
Supplement: d1tc01737c1.pdf [file d1tc01737c1.pdf]

# Synthesis, crystal chemistry, and optical properties of two methylammonium silver halides: $\text{CH}_3\text{NH}_3\text{AgBr}_2$ and $\text{CH}_3\text{NH}_3\text{Ag}_2\text{I}_3$

Matthew B. Gray, Noah P. Holzapfel, Tianyu Liu, Victor P. Barbosa, Nicholas P. Harvey, and Patrick M. Woodward\*

Department of Chemistry and Biochemistry, The Ohio State University, 100 W. 18th Avenue, Columbus, Ohio 43210, United States

## Supporting Information:

**Table S1.** Single crystal XRD data for  $\text{CH}_3\text{NH}_3\text{AgBr}_2$  and  $\text{CH}_3\text{NH}_3\text{Ag}_2\text{I}_3$ .

| Empirical formula    | $\text{CH}_3\text{NH}_3\text{AgBr}_2$ | $\text{CH}_3\text{NH}_3\text{Ag}_2\text{I}_3$ |
|----------------------|---------------------------------------|-----------------------------------------------|
| Temperature          | 296.15 K                              | 296.15 K                                      |
| Crystal system       | Orthorhombic                          | Monoclinic                                    |
| Space group          | <i>Pnma</i>                           | <i>P2<sub>1</sub>/m</i>                       |
| Unit cell dimensions | $a = 9.0387(11) \text{ \AA}$          | $a = 9.019(3) \text{ \AA}$                    |
|                      | $b = 4.6831(5) \text{ \AA}$           | $b = 6.329(2) \text{ \AA}$                    |
|                      | $c = 14.7759(13) \text{ \AA}$         | $c = 9.134(3) \text{ \AA}$                    |
|                      | $\alpha = 90^\circ$                   | $\alpha = 90^\circ$                           |
|                      | $\beta = 90^\circ$                    | $\beta = 110.431(10)^\circ$                   |
|                      | $\gamma = 90^\circ$                   | $\gamma = 90^\circ$                           |
| Volume               | $625.45(12) \text{ \AA}^3$            | $488.6(3) \text{ \AA}^3$                      |
| Z                    | 4                                     | 2                                             |

|                                          |                                             |                                             |
|------------------------------------------|---------------------------------------------|---------------------------------------------|
| <b>Density (calculated)</b>              | 3.183 g/cm <sup>3</sup>                     | 4.272 g/cm <sup>3</sup>                     |
| <b>Absorption coefficient</b>            | 15.857 mm <sup>-1</sup>                     | 13.404 mm <sup>-1</sup>                     |
| <b>F(000)</b>                            | 544.0                                       | 544.0                                       |
| <b>Crystal size</b>                      | 0.451 × 0.123 × 0.067 mm <sup>3</sup>       | 0.183 × 0.109 × 0.087 mm <sup>3</sup>       |
| <b>Crystal color, habit</b>              | Colorless plate                             | Colorless plate                             |
| <b>2 Theta range for data collection</b> | 5.284 to 50.988°                            | 4.76 to 50.856°                             |
| <b>Index ranges</b>                      | -10 ≤ h ≤ 7, -5 ≤ k ≤ 4, -17 ≤ l ≤ 17       | -10 ≤ h ≤ 10, -7 ≤ k ≤ 7, -11 ≤ l ≤ 11      |
| <b>Reflections collected</b>             | 2651                                        | 5985                                        |
| <b>Independent reflections</b>           | 656 [R(int) = 0.0270, R(sigma) = 0.0240]    | 992 [R(int) = 0.0383, R(sigma) = 0.0303]    |
| <b>Refinement method</b>                 | Full-matrix least-squares on F <sup>2</sup> | Full-matrix least-squares on F <sup>2</sup> |
| <b>Data / restraints / parameters</b>    | 656 / 0 / 33                                | 992 / 0 / 42                                |
| <b>Goodness-of-fit on F<sup>2</sup></b>  | 0.922                                       | 1.009                                       |
| <b>Final R indices [I&gt;2sigma(I)]</b>  | R1 = 0.0388, wR2 = 0.1105                   | R1 = 0.0357, wR2 = 0.0890                   |
| <b>R indices (all data)</b>              | R1 = 0.0443, wR2 = 0.1161                   | R1 = 0.0509, wR2 = 0.0947                   |
| <b>Largest diff. peak and hole</b>       | 0.69 and -1.80 e Å <sup>-3</sup>            | 0.87 and -1.43 e Å <sup>-3</sup>            |

**Table S2.** Fractional atomic coordinates, equivalent isotropic displacement parameters, and chemical occupancy for CH<sub>3</sub>NH<sub>3</sub>AgBr<sub>2</sub>. U<sub>eq</sub> is defined as 1/3 of the trace of the orthogonalized U<sub>ij</sub> tensor.

| Atom  | Wyckoff Site | x           | y      | z          | U <sub>eq</sub> (Å <sup>2</sup> ) | Occupancy |
|-------|--------------|-------------|--------|------------|-----------------------------------|-----------|
| Ag    | 4c           | 0.52170(10) | 0.7500 | 0.41899(4) | 0.0701(4)                         | 1         |
| Br(1) | 4c           | 0.37286(9)  | 0.7500 | 0.26412(5) | 0.0524(3)                         | 1         |
| Br(2) | 4c           | 0.67197(10) | 0.2500 | 0.43483(5) | 0.0527(3)                         | 1         |
| N     | 4c           | 0.6145(8)   | 0.2500 | 0.1976(4)  | 0.0612(19)                        | 1         |
| C     | 4c           | 0.6057(14)  | 0.2500 | 0.1002(5)  | 0.081(3)                          | 1         |
| H(1)  | 8d           | 0.5371      | 0.3428 | 0.2204     | 0.073                             | 0.5       |
| H(2)  | 8d           | 0.6976      | 0.3363 | 0.2149     | 0.073                             | 0.5       |
| H(3)  | 8d           | 0.6144      | 0.0709 | 0.2177     | 0.073                             | 0.5       |
| H(4)  | 8d           | 0.5191      | 0.3532 | 0.0814     | 0.122                             | 0.5       |
| H(5)  | 8d           | 0.5997      | 0.0569 | 0.0787     | 0.122                             | 0.5       |
| H(6)  | 8d           | 0.6922      | 0.3400 | 0.0755     | 0.122                             | 0.5       |

**Table S3.** Bond lengths for CH<sub>3</sub>NH<sub>3</sub>AgBr<sub>2</sub>.

| <b>Atom</b>                                                                  | <b>Atom</b>       | <b>Length(Å)</b> |
|------------------------------------------------------------------------------|-------------------|------------------|
| Ag01                                                                         | Br02              | 2.654(1)         |
| Ag01                                                                         | Br03 <sup>3</sup> | 2.7171(6)        |
| Ag01                                                                         | Br03 <sup>1</sup> | 2.780(1)         |
| Ag01                                                                         | Br03              | 2.7171(6)        |
| N004                                                                         | C005              | 1.442(9)         |
| <sup>1</sup> 1-X,1-Y,1-Z; <sup>2</sup> 1-X,2-Y,1-Z;<br><sup>3</sup> X,1+Y,+Z |                   |                  |

**Table S4.** Bond angles for CH<sub>3</sub>NH<sub>3</sub>AgBr<sub>2</sub>.

| Atom                                             | Atom | Atom              | Angle(°)  |
|--------------------------------------------------|------|-------------------|-----------|
| Br02                                             | Ag01 | Br03 <sup>1</sup> | 110.53(4) |
| Br02                                             | Ag01 | Br03              | 109.12(2) |
| Br02                                             | Ag01 | Br03 <sup>2</sup> | 109.12(2) |
| Br03                                             | Ag01 | Br03 <sup>1</sup> | 104.35(3) |
| Br03 <sup>2</sup>                                | Ag01 | Br03              | 119.04(4) |
| Br03 <sup>2</sup>                                | Ag01 | Br03 <sup>1</sup> | 104.35(3) |
| <sup>1</sup> 1-X,1-Y,1-Z; <sup>2</sup> +X,1+Y,+Z |      |                   |           |

**Table S5.** Fractional atomic coordinates, equivalent isotropic displacement parameters, and chemical occupancy for CH<sub>3</sub>NH<sub>3</sub>Ag<sub>2</sub>I<sub>3</sub>. U<sub>eq</sub> is defined as 1/3 of the trace of the orthogonalized U<sub>ij</sub> tensor.

| Atom | Wyckoff Site | x           | y           | z          | U <sub>eq</sub> (Å <sup>2</sup> ) | Occupancy |
|------|--------------|-------------|-------------|------------|-----------------------------------|-----------|
| I(1) | 2e           | 0.43266(9)  | 0.7500      | 0.11181(9) | 0.0549(3)                         | 1         |
| I(2) | 2e           | -0.08120(8) | 0.7500      | 0.14806(8) | 0.0523(2)                         | 1         |
| I(3) | 2e           | 0.28412(10) | 0.2500      | 0.41270(9) | 0.0593(3)                         | 1         |
| Ag   | 4f           | 0.18624(8)  | 0.49961(12) | 0.14033(8) | 0.0698(3)                         | 1         |
| N    | 2e           | 0.6416(13)  | 0.2500      | 0.3137(12) | 0.090(4)                          | 1         |
| C    | 2e           | 0.8132(14)  | 0.2500      | 0.3701(13) | 0.070(4)                          | 1         |
| H(1) | 4f           | 0.6063      | 0.3814      | 0.2896     | 0.108                             | 0.5       |
| H(2) | 4f           | 0.6081      | 0.1998      | 0.3877     | 0.108                             | 0.5       |
| H(3) | 4f           | 0.6052      | 0.1688      | 0.2290     | 0.108                             | 0.5       |
| H(4) | 4f           | 0.8525      | 0.3390      | 0.4606     | 0.105                             | 0.5       |
| H(5) | 4f           | 0.8494      | 0.3025      | 0.2898     | 0.105                             | 0.5       |
| H(6) | 4f           | 0.8513      | 0.1086      | 0.3973     | 0.105                             | 0.5       |

**Table S6.** Bond lengths for CH<sub>3</sub>NH<sub>3</sub>Ag<sub>2</sub>I<sub>3</sub>.

| Atom                                                                                                 | Atom              | Length(Å)  |
|------------------------------------------------------------------------------------------------------|-------------------|------------|
| I001                                                                                                 | Ag00 <sup>1</sup> | 2.8149(12) |
| I001                                                                                                 | Ag00              | 2.8149(12) |
| I002                                                                                                 | Ag00 <sup>1</sup> | 2.9076(12) |
| I002                                                                                                 | Ag00              | 2.9076(12) |
| I002                                                                                                 | Ag00 <sup>2</sup> | 2.9307(12) |
| I002                                                                                                 | Ag00 <sup>3</sup> | 2.9307(12) |
| I003                                                                                                 | Ag00 <sup>4</sup> | 2.8161(12) |
| I003                                                                                                 | Ag00              | 2.8161(12) |
| N005                                                                                                 | C1                | 1.450(14)  |
| <sup>1</sup> +X,3/2-Y,+Z; <sup>2</sup> -X,1/2+Y,-Z; <sup>3</sup> -X,1-Y,-Z; <sup>4</sup> +X,1/2-Y,+Z |                   |            |

**Table S7.** Bond angles for CH<sub>3</sub>NH<sub>3</sub>Ag<sub>2</sub>I<sub>3</sub>.

| <b>Atom</b>            | <b>Atom</b> | <b>Atom</b>       | <b>Angle(°)</b> |
|------------------------|-------------|-------------------|-----------------|
| I001                   | Ag00        | I002 <sup>1</sup> | 103.79(3)       |
| I001                   | Ag00        | I002              | 112.58(4)       |
| I001                   | Ag00        | I003              | 112.54(3)       |
| I002                   | Ag00        | I002 <sup>1</sup> | 107.76(3)       |
| I003                   | Ag00        | I002 <sup>1</sup> | 113.25(4)       |
| I003                   | Ag00        | I002              | 106.93(3)       |
| <sup>1</sup> -X,1-Y,-Z |             |                   |                 |



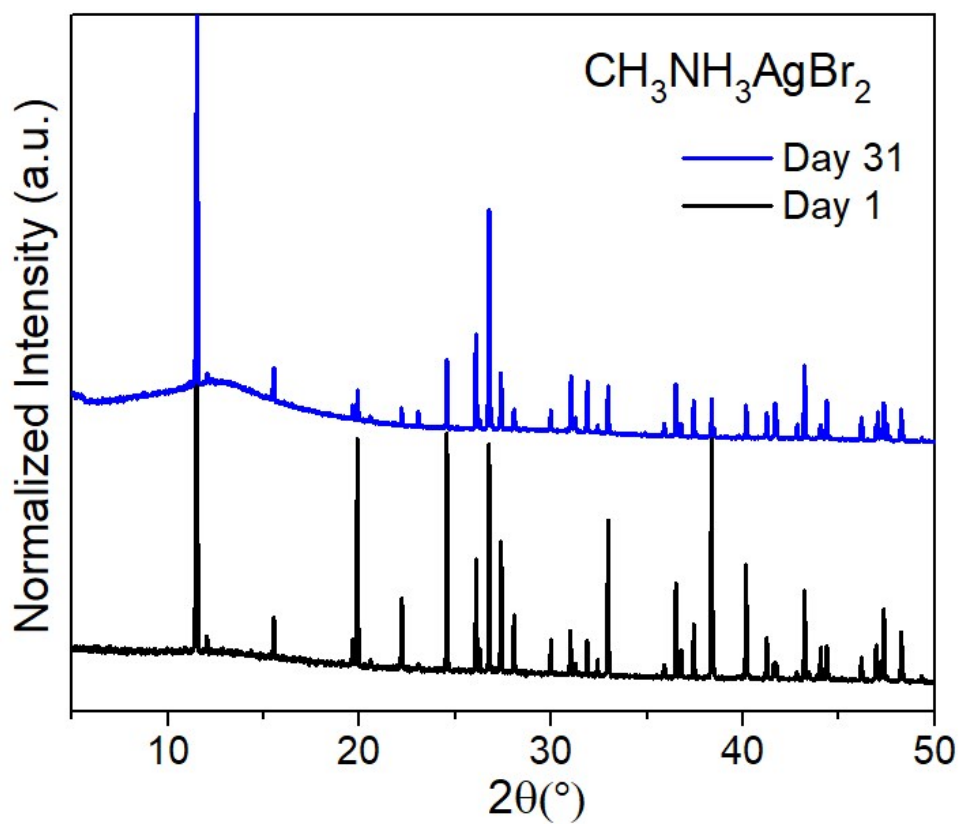

**Figure S1.** PXRD of  $\text{CH}_3\text{NH}_3\text{AgBr}_2$  measured after synthesis (black) and after ~1 month (blue). Changes that are observed appear to be due to different preferred orientation effects. The lack of any new peaks indicates stability under ambient conditions.

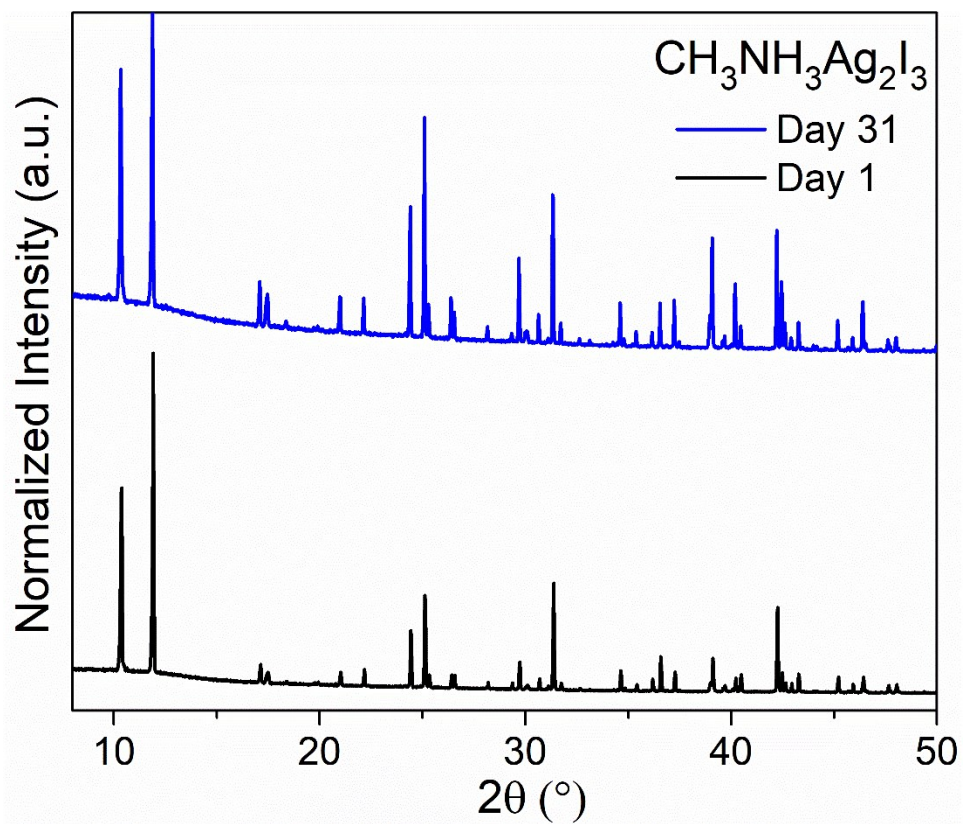

**Figure S2.** PXRD of  $\text{CH}_3\text{NH}_3\text{Ag}_2\text{I}_3$  measured after synthesis (black) and after ~1 month (blue). Minimal changes are observed, indicating stability towards ambient conditions.

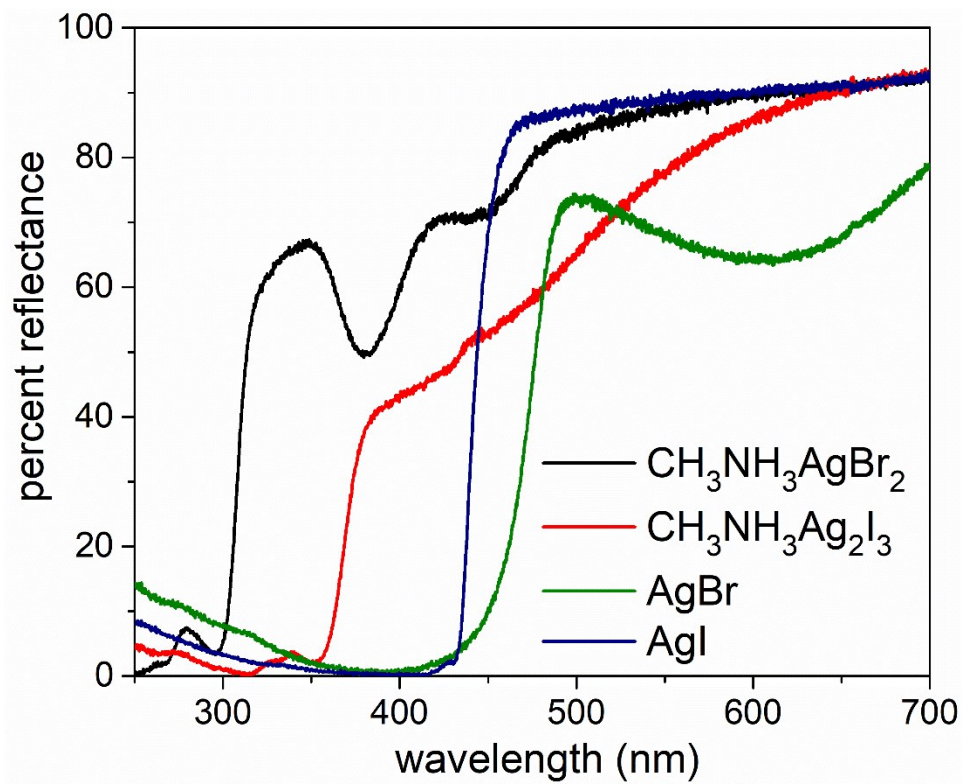

**Figure S3.** Diffuse reflectance data for the ternary phases and the silver halide starting materials. A blue shift in absorption is observed, in part due to decreased electronic dimensionality.

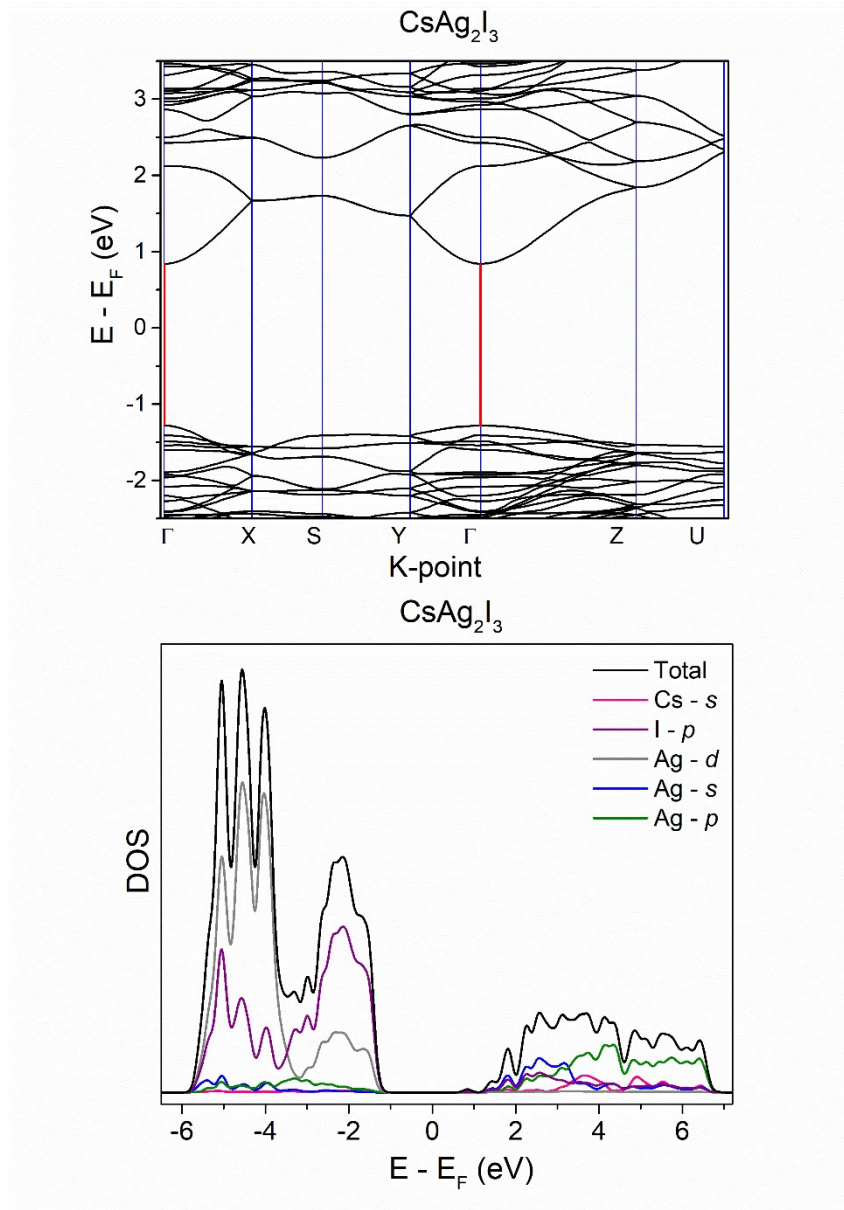

**Figure S4.** (Top) Band structure of CsAg<sub>2</sub>I<sub>3</sub>. The k-points are highlighted in blue and the direct transition at the  $\Gamma$ -point is highlighted in red. (Bottom) Total and partial DOS for CsAg<sub>2</sub>I<sub>3</sub>.

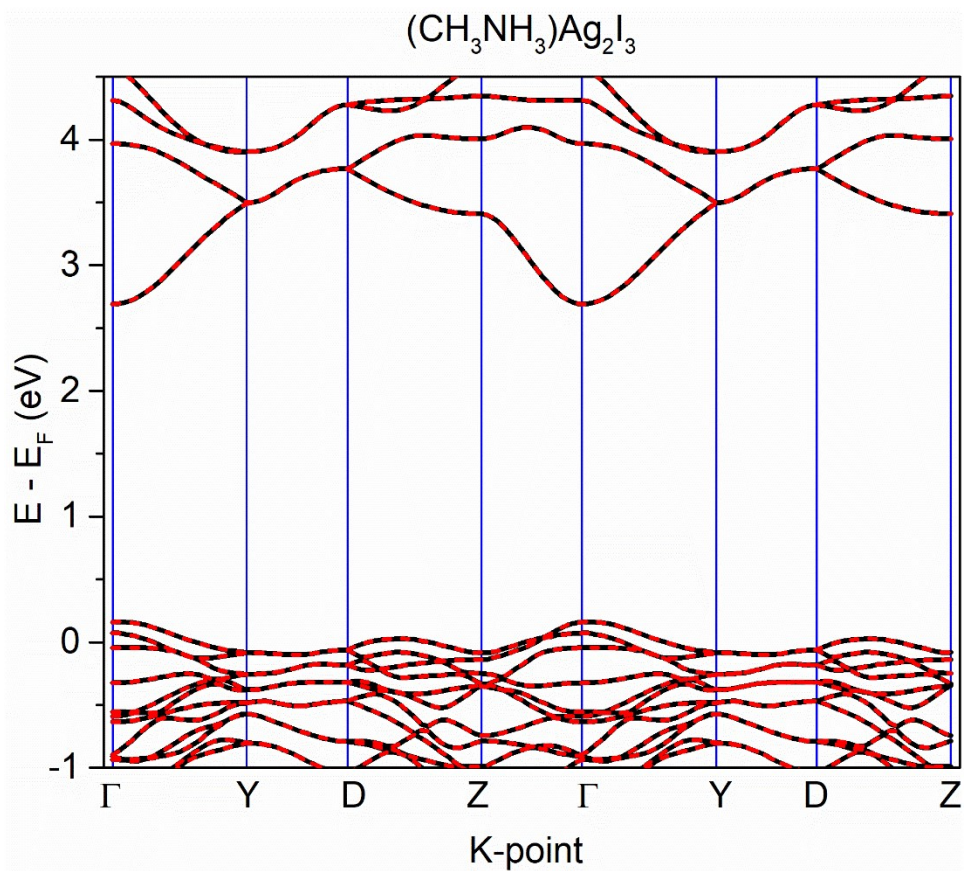

**Figure S5.** Comparison of CH<sub>3</sub>NH<sub>3</sub>Ag<sub>2</sub>I<sub>3</sub> with and without spin orbit coupling (SOC). Red dashed line represents calculation performed with SOC. Minimal changes were observed, indicating SOC has a minor effect on the band dispersion in the frontier bands.

**Table S8.** List of related ternary (Rb/Cs/(CH<sub>3</sub>NH<sub>3</sub>))-(Ag/Cu)-(Cl/Br/I) phases. Coordination environment of the polyhedra are provided. A (\*) denotes an observed polyhedral distortion.

| Compound                                                       | Space Group             | <i>a</i> (Å) | <i>b</i> (Å) | <i>c</i> (Å) | Ag <sup>+</sup> Coordination | Reference | ICSD # |
|----------------------------------------------------------------|-------------------------|--------------|--------------|--------------|------------------------------|-----------|--------|
| Rb <sub>2</sub> AgCl <sub>3</sub>                              | <i>Pnma</i>             | 9.205        | 4.482        | 17.874       | tetrahedra                   | 1         | 280031 |
| Rb <sub>2</sub> AgBr <sub>3</sub>                              | <i>Pnma</i>             | 9.577        | 4.646        | 18.663       | tetrahedra                   | 2         | 150287 |
| Rb <sub>2</sub> AgI <sub>3</sub>                               | <i>Pnma</i>             | 10.238       | 4.898        | 19.984       | tetrahedra                   | 2         | 150290 |
| CsAgCl <sub>2</sub>                                            | <i>Cmcm</i>             | 4.376        | 19.186       | 5.685        | square pyramid*              | 2         | 150299 |
| Cs <sub>2</sub> AgCl <sub>3</sub>                              | <i>Pnma</i>             | 13.210       | 4.551        | 13.758       | tetrahedra*                  | 2         | 150286 |
| Cs <sub>2</sub> AgBr <sub>3</sub>                              | <i>Pnma</i>             | 13.755       | 4.719        | 14.362       | tetrahedra                   | 2         | 150288 |
| CsAgBr <sub>2</sub>                                            | <i>Cmcm</i>             | 4.574        | 19.894       | 5.947        | square pyramid*              | 2         | 150301 |
| Cs <sub>2</sub> AgI <sub>3</sub>                               | <i>Pnma</i>             | 14.588       | 4.951        | 15.298       | tetrahedra                   | 2         | 150291 |
| CsAg <sub>2</sub> I <sub>3</sub>                               | <i>Pbnm</i>             | 11.076       | 13.743       | 6.231        | tetrahedra                   | 2         | 150308 |
| K <sub>2</sub> CuCl <sub>3</sub>                               | <i>Pnma</i>             | 12.030       | 4.148        | 12.587       | tetrahedra                   | 2         | 150292 |
| K <sub>2</sub> CuBr <sub>3</sub>                               | <i>Pnma</i>             | 12.607       | 4.336        | 13.247       | tetrahedra                   | 2         | 150293 |
| Rb <sub>2</sub> CuCl <sub>3</sub>                              | <i>Pnma</i>             | 12.501       | 4.272        | 13.000       | tetrahedra                   | 2         | 150294 |
| Rb <sub>2</sub> CuBr <sub>3</sub>                              | <i>Pnma</i>             | 13.073       | 4.452        | 13.641       | tetrahedra                   | 2         | 150295 |
| CH <sub>3</sub> NH <sub>3</sub> AgBr <sub>2</sub>              | <i>Pnma</i>             | 9.0387       | 4.6831       | 14.776       | tetrahedra                   | this work | -      |
| CH <sub>3</sub> NH <sub>3</sub> Cu <sub>2</sub> I <sub>3</sub> | <i>P2<sub>1</sub>/m</i> | 8.9053       | 5.8982       | 9.077        | tetrahedra                   | 3         | 263606 |
| CH <sub>3</sub> NH <sub>3</sub> Ag <sub>2</sub> I <sub>3</sub> | <i>P2<sub>1</sub>/m</i> | 9.019        | 6.329        | 9.134        | tetrahedra                   | this work | -      |



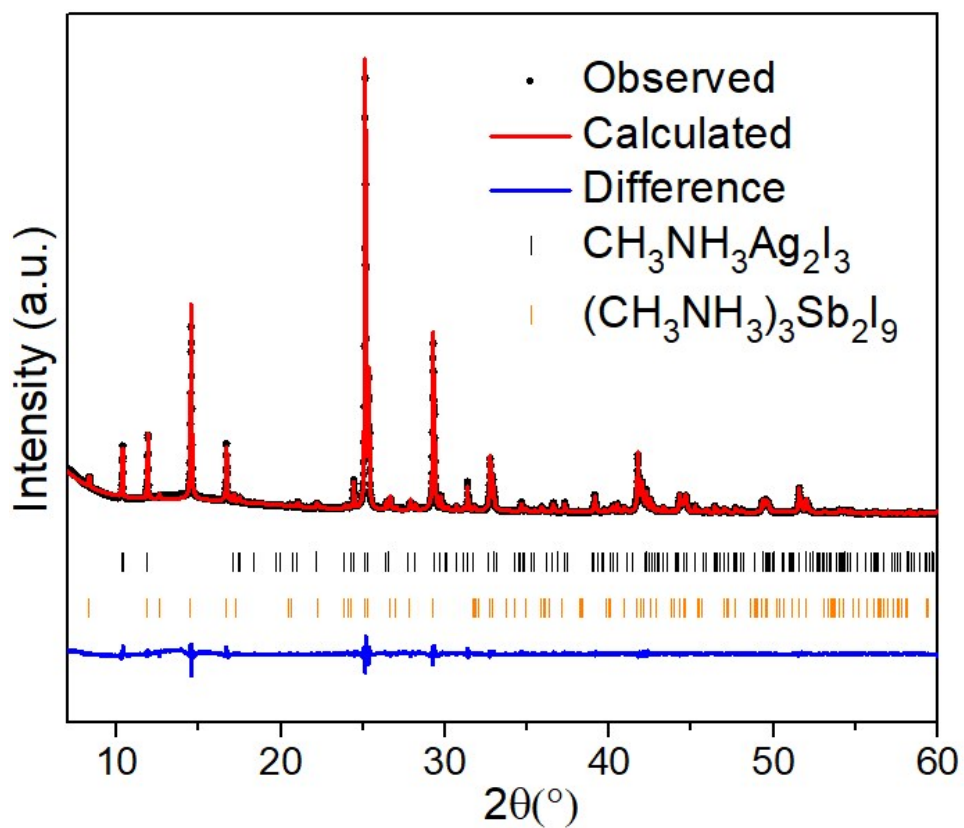

**Figure S6.** Pawley refinement of “ $(\text{CH}_3\text{NH}_3)_2\text{AgSbI}_6$ ”, fit to  $\text{CH}_3\text{NH}_3\text{Ag}_2\text{I}_3$  and  $(\text{CH}_3\text{NH}_3)_3\text{Sb}_2\text{I}_9$ . Observed, calculated and difference curves are plotted with black dots, a red line, and a blue line, respectively.  $\text{CH}_3\text{NH}_3\text{Ag}_2\text{I}_3$  is denoted by black tick marks, while  $(\text{CH}_3\text{NH}_3)_3\text{Sb}_2\text{I}_9$  is denoted by orange tick marks.

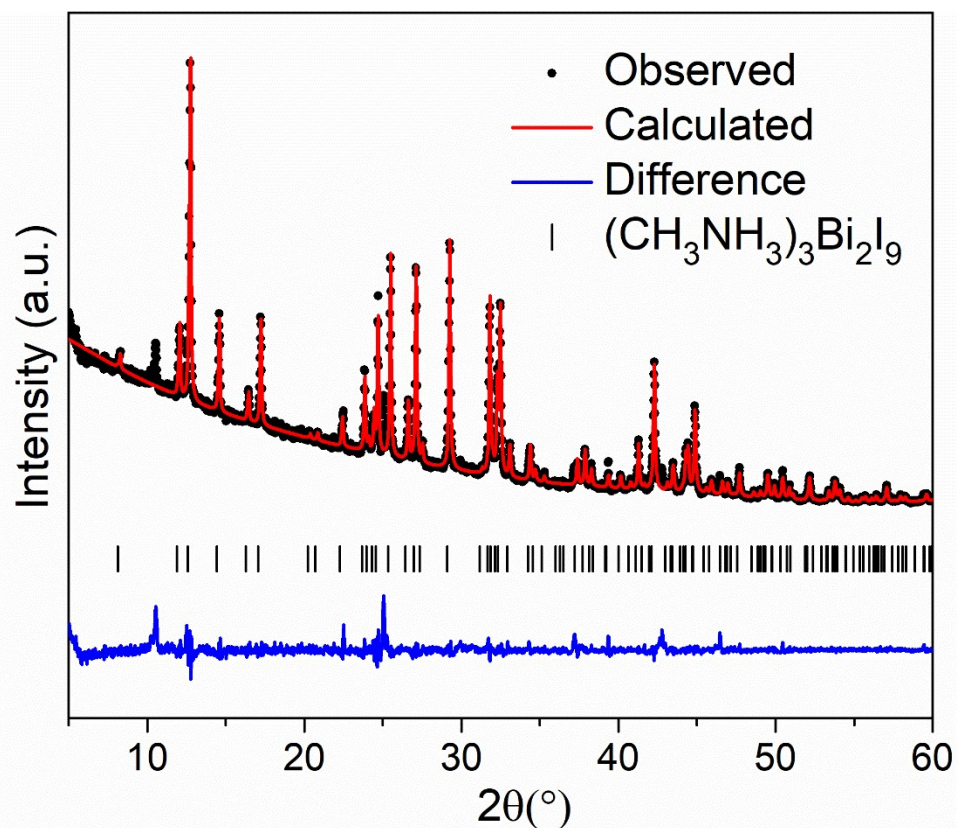

**Figure S7.** Pawley refinement of “ $(\text{CH}_3\text{NH}_3)_2\text{AgBiI}_6$ ”, fit to  $(\text{CH}_3\text{NH}_3)_3\text{Bi}_2\text{I}_9$ . Observed, calculated and difference curves are plotted with black dots, a red line, and a blue line, respectively.  $(\text{CH}_3\text{NH}_3)_3\text{Sb}_2\text{I}_9$  is denoted by black tick marks. An additional phase is present but could not be fit from the powder data.



**References:**

1. C. Hasselgren, S. Jagner, Dirubidium *catena*-poly[dichloro-argentate(I)- $\mu$ -chloro]., *Acta Cryst.*, 1999, **C55**, 1208.
2. S. Hull, P. Berastegui, Crystal structures and ionic conductivities of ternary derivatives of the silver and copper monohalides – II: ordered phases within the  $(\text{AgX})_x\text{-(MX)}_{1-x}$  and  $(\text{CuX})_x\text{-(MX)}_{1-x}$  (M = K, Rb, and Cs; X = Cl, Br, and I) systems. *J. Solid State Chem.*, 2004, **177**, 3156.
3. A. Petrov, V. Khrustalev, Y. Zubavichus, P. Dorovatovskii, E. Goodilin, A. Tarasov, Synthesis and crystal structure of a new hybrid methylammonium iodocuprate. *Mendeleev Commun.*, 2018, **28**, 245.
